# Supplementary material for: Assessing the Privacy of mHealth Apps for Self-Tracking: Heuristic Evaluation Approach
Source: PubMed Central journal article supplement (PMC6231850; doi:10.2196/mhealth.9217), 2018-10-22
Supplement: mhealth_v6i10e185_app1.pdf [file mhealth_v6i10e185_app1.pdf]

# Quantified self privacy heuristics.

Version 1

October 23, 2017

## 1 Notice/awareness

- H1 Before data are shared with a remote actor, the entity collecting the data is explicitly identified [0-2]
- 0: Entity is not identified
  - 1: Entity is identified
  - 2: No remote sharing
- H2 Before data are shared with a remote actor, the uses of the data are explicitly identified [0-2]
- 0: Uses are not identified
  - 1: Uses are identified
  - 2: No remote sharing
- H3 Before data are shared with a remote actor, the potential recipients are explicitly identified [0-2]
- 0: Recipients are not identified
  - 1: Recipients are identified
  - 2: No remote sharing
- H4 The nature of the data collected and by which means are explicitly identified [0-2]
- 0: Nature of data collection not identified
  - 1: Nature of data collection is identified
  - 2: No remote sharing
- H5 Steps taken to ensure confidentiality, integrity, and quality of data are explained [0-2]
- 0: Steps taken not identified
  - 1: Steps taken identified
  - 2: No remote sharing
- H6 For those of above satisfied, notice is sufficiently explicit [0-4]
- 0: No data usage explained
  - 1: No requirement for terms of service/privacy policies to be read: eg. links which opens in browser

- 2: Requirement for policies to be read: eg. shown in situ before consent acquired and must be scrolled through
  - 3: Must be read and data usage policy described in non-legal language
  - 4: Must be read and comprehension of data usage is assessed
- H7 Can control when data are used for non-operational secondary use, such as marketing or research. [0-2]
- 0: No control over who receives which data
  - 1: Must explicitly allow data to be shared for secondary uses
  - 2: Can control which data is shared with other actors, or no data are shared.

## 2 Choice/consent

- H8 Consent acquired before data shared with remote actor [0-2]
- 0: Consent not acquired
  - 1: Consent acquired
  - 2: No remote sharing
- H9 Consent is explicitly opt-in: no pre-ticked checkboxes etc. [0-2]
- 0: Consent flow mixes opt-in and opt-out elements: eg. “check to agree” alongside “check to opt-out of data sharing”
  - 1: Consent includes pre-filled elements, for agreement or sharing with third parties
  - 2: Consent is opt-in: requires checkbox ticked or “agree” button clicked, etc.
- H10 Can choose which data types are automatically collected from sensors or other sources eg. connect a finance app to a single bank account, or track steps but not heart rate [0-2]
- 0: No controls over collection of specific data types
  - 1: Must consent to individual sensors being engaged or data types collected
  - 2: Can revoke ability to track particular data types at any time
- H11 Data collection consent is dynamic: if new types of data are being collected, consent is renewed in situ. [0-2]
- 0: No dynamic consent acquisition
  - 1: Consent acquired before a new sensor is engaged or data type collected, eg. using device permission APIs
  - 2: Contextual permission includes a meaningful justification for why new sensor is required
- H12 Data processing consent is dynamic: if the purpose of processing changes, consent is renewed. [0-3]
- 0: No dynamic consent
  - 1: Notification of processing changes (implied consent)
  - 2: Consent acquired after processing changes
  - 3: Purpose of change explained clearly and consent acquired

- H13 Data distribution consent is dynamic: if the actors data are distributed to changes, consent is renewed. [0-3]
- 0: No dynamic consent
  - 1: Notification of distribution changes (implied consent)
  - 2: Consent acquired after distribution changes
  - 3: Purpose of change explained clearly and consent acquired
- H14 Consent to store and process data can be revoked at any time: with the service, and any other actors [0-3]
- 0: No consent revocation
  - 1: Consent can be revoked by contacting support
  - 2: Consent with third parties can only be revoked from those third parties
  - 3: Consent with service and all third party actors can be revoked from within the app/service
- H15 Can control where data are stored [0-2]
- 0: Data are stored on vendor servers or choice of cloud provider, with no user control over this
  - 1: Can choose which provider stores data (eg. Amazon vs Google)
  - 2: Can choose to only store data on-device and selectively disclose to other actors

### **3 Access/participation**

- H16 All raw collected data can be extracted from the service (in-app or via vendor's website) [0-3]
- 0: No method of extracting data
  - 1: Data can be extracted in aggregate form (eg. daily totals/averages)
  - 2: Subset of *raw* data can be extracted (eg. only certain data types, or limited time range)
  - 3: All raw data can be extracted
- H17 All data are available in standard text formats (CSV, XML, JSON, GPX, etc) [0-2]
- 0: Data are not available
  - 1: Data available in proprietary or binary formats
  - 2: Data available in standard text formats
- H18 Data extraction is available from within the service: eg. without raising a request with support [0-2]
- 0: No method for extracting data
  - 1: Data can be extracted by contacting the service provider
  - 2: Data can be extracted at any time from within the service (even if there is a delay while an archive is generated)
- H19 Programmatic access to data is possible: eg. APIs are exposed [0-2]
- 0: No programmatic access
  - 1: Limited programmatic access (aggressively rate limited, subset of data exposed)
  - 2: Full programmatic access (eg. H16 and H17 can be satisfied programmatically)

## 4 Social disclosure usability

- H20 Privacy controls are per-disclosure: eg. individual workouts can be published to a social network site, not relying solely on global defaults [0-2]
- 0: No per-disclosure controls
  - 1: Can choose to disclose individual actions
  - 2: Can choose the audience for individual disclosures
- H21 Privacy controls allow granular sharing of data types: for example, when sharing a workout, the distance can be shared but not the pace. [0/1]
- 0: No granular controls
  - 1: Can choose which attributes of an event are shared
- H22 Error prevention: is explicit confirmation acquired before a disclosure? [0-2]
- 0: No confirmation acquired
  - 1: Confirmation needed before disclosure
  - 2: Confirmation needed and able to quickly revoke an erroneous disclosure (this is distinct from being able to revoke/correct historic data)
- H23 Minimise user memory load: Effects of a disclosure are visible throughout the disclosure flow (ie. memory of earlier decisions not required) [0/1]
- 0: Content or audience of a disclosure is occluded at points during disclosure process
  - 1: Content and audience of a disclosure is available during the disclosure process
- H24 Minimalist: During the disclosure flow no extraneous information (such as adverts or irrelevant UI elements) is displayed [0/1]
- 0: Extraneous information displayed during disclosure process
  - 1: All information presented during disclosure is relevant to configuring the disclosure
- H25 Consistency: Information shown during the disclosure flow is consistent with the effect of the disclosure [0/1]
- 0: The effect of the disclosure does not match what was presented during the disclosure flow, whether over or under-sharing.
  - 1: The effect of the disclosure is consistent with the information presented during the disclosure process, with no more, or less, data being shared than the disclosure flow suggests.
- H26 Help and documentation: Contextual help with making privacy decisions is available [0-2]
- 0: No contextual support in disclosure or privacy settings UIs
  - 1: Linked to external support (eg. documentation which launches in browser)
  - 2: Documentation is natively embedded within the app
