# Supplementary material for: Assessing the Privacy of mHealth Apps for Self-Tracking: Heuristic Evaluation Approach
Source: PubMed Central journal article supplement (PMC6231850; doi:10.2196/mhealth.9217), 2018-10-22
Supplement: mhealth_v6i10e185_app3.pdf [file mhealth_v6i10e185_app3.pdf]

## Appendix 2: Apps chosen for heuristic evaluation

| Package name                         | Name                           | Version tested | Keywords                                        | Group    | Min Downloads | Max Downloads |
|--------------------------------------|--------------------------------|----------------|-------------------------------------------------|----------|---------------|---------------|
| com.popularapp.periodcalendar        | Period Tracker, My Calendar    | 1.5907.145     | [mood]                                          | mood     | 50000000      | 100000000     |
| com.myfitnesspal.android             | Calorie Counter - MyFitnessPal | 6.6            | [weight, diet]                                  | diet     | 50000000      | 100000000     |
| com.runtastic.android                | Runtastic Running & Fitness    | 7.1.1          | [running, running, exercise, workouts]          | running  | 10000000      | 50000000      |
| com.nike.plusgps                     | Nike+ Run Club                 | 2.3.2          | [running, running]                              | running  | 10000000      | 50000000      |
| com.fitnesskeeper.runkeeper.pro      | RunKeeper - GPS Track Run Walk | 7.3.2          | [walking, running, running]                     | running  | 10000000      | 50000000      |
| com.endomondo.android                | Endomondo - Running & Walking  | 12.12.0        | [walking, running, exercise, workouts, cycling] | running  | 10000000      | 50000000      |
| si.modula.android.instantheartrate   | Instant Heart Rate Monitor     | 5.36.2835      | [heartrate, heart rate]                         | heart    | 10000000      | 50000000      |
| cc.pacer.androidapp                  | Pedometer & Weight Loss Coach  | p2.16.1        | [weight, steps, walking]                        | weight   | 10000000      | 50000000      |
| com.urbandroid.sleep                 | Sleep as Android               | 20161122       | [sleep, sleep]                                  | sleep    | 10000000      | 50000000      |
| com.strava                           | Strava Running and Cycling GPS | 5.10.0         | [running, running, cycling]                     | running  | 5000000       | 10000000      |
| com.tayu.tau.pedometer               | Pedometer                      | 5.19.0         | [steps, walking]                                | steps    | 10000000      | 50000000      |
| com.fitbit.FitbitMobile              | Fitbit                         | 2.4.3          | [steps, exercise, workouts]                     | hardware | 10000000      | 50000000      |
| com.sec.android.app.shealth          | S Health                       | 5.4.1.0003     | [steps, heart rate]                             | steps    | 100000000     | 500000000     |
| com.kpmoney.android                  | AndroMoney ( Expense Track )   | 2.9.0          | [spending, income]                              | spending | 1000000       | 5000000       |
| com.google.android.apps.fitness      | Google Fit - Fitness Tracking  | 1.62.06-108    | [steps, walking, exercise, workouts]            | steps    | 10000000      | 50000000      |
| com.stt.android                      | Sports Tracker Running Cycling | 3.9.17         | [exercise, workouts, cycling]                   | running  | 5000000       | 10000000      |
| com.sonymobile.lifelog               | Lifelog                        | 3.0.A.4.34     | [steps]                                         | steps    | 10000000      | 50000000      |
| com.runtastic.android.heartrate.lite | Runtastic Heart Rate Monitor   | 2.3            | [heartrate, heart rate]                         | heart    | 5000000       | 10000000      |
| com.mapmyrun.android2                | Run with Map My Run            | 16.12.1        | [running, running]                              | running  | 5000000       | 10000000      |
| com.noom.walk                        | Noom Walk Pedometer            | 1.4.0          | [steps, walking]                                | steps    | 10000000      | 50000000      |
| com.dietcoacher.sos                  | My Diet Coach - Weight Loss    | 4.4.1          | [weight, diet]                                  | weight   | 10000000      | 50000000      |
| tools.bmirechner                     | BMI Calculator & Weight Loss   | 3.7.9          | [weight]                                        | weight   | 10000000      | 50000000      |
| com.todoist                          | Todoist: To-Do List, Task List | 11.2.4         | [time keeping]                                  | time     | 10000000      | 50000000      |
| com.weightwatchers.mobile            | Weight Watchers Mobile         | 5.3.1          | [weight, eating]                                | weight   | 5000000       | 10000000      |
| com.mapmywalk.android2               | Walk with Map My Walk          | 16.11.1        | [walking]                                       | steps    | 1000000       | 5000000       |
| com.runtastic.android.roadbike.lite  | Runtastic Road Bike GPS App    | 3.0.2          | [cycling]                                       | cycling  | 1000000       | 5000000       |

|                                            |                                |                |                         |          |         |          |
|--------------------------------------------|--------------------------------|----------------|-------------------------|----------|---------|----------|
| com.bookmark.money                         | Money Lover - Money Manager    | android-3.5.86 | [spending]              | spending | 1000000 | 5000000  |
| com.lib.cwmoney                            | CWMoney 2.21 Expense Track     | 2.23           | [spending]              | spending | 1000000 | 5000000  |
| com.runtastic.android.sleepbetter.lite     | Sleep Better with Runtastic    | 2.3            | [sleep, sleep]          | sleep    | 1000000 | 5000000  |
| com.runtastic.android.pedometer.lite       | Runtastic Pedometer Step Count | 1.6.2          | [steps]                 | steps    | 5000000 | 10000000 |
| monitoryourweight.bustan.net               | Monitor Your Weight            | 4.8.8          | [weight]                | weight   | 5000000 | 10000000 |
| com.mapmyride.android2                     | Map My Ride GPS Cycling Riding | 12.12.1        | [cycling]               | cycling  | 1000000 | 5000000  |
| com.sillens.shapeupclub                    | Lifesum - The Health Movement  | 4.2.0          | [diet]                  | diet     | 5000000 | 10000000 |
| com.moneyfy.app.lite                       | Moneyfy - Money Manager        | 1.7.8          | [spending]              | spending | 1000000 | 5000000  |
| com.realbyteapps.moneymanagerfree          | Money Manager Expense & Budget | 3.6.12 FO      | [spending]              | spending | 1000000 | 5000000  |
| com.fitnow.loseit                          | Lose it!                       | 7.2.5          | [eating, diet]          | diet     | 5000000 | 10000000 |
| com.expensemanager                         | Expense Manager                | 3.2.3          | [spending]              | spending | 1000000 | 5000000  |
| com.droid4you.application.wallet           | Wallet - Budget Tracker        | 4.3.3          | [spending]              | spending | 1000000 | 5000000  |
| com.gmail.jmartindev.timetune              | TimeTune - Conquer Your Time   | 2.0.3          | [time keeping]          | time     | 1000000 | 5000000  |
| com.northcube.sleepcycle                   | Sleep Cycle alarm clock        | 1.4.1192       | [sleep, sleep]          | sleep    | 500000  | 1000000  |
| com.yazio.android                          | Calorie Counter & Diet Tracker | 3.1.0.3        | [diet]                  | diet     | 1000000 | 5000000  |
| com.azumio.android.sleeptime               | Sleep Time Smart Alarm Clock   | 1.36.1042      | [sleep]                 | sleep    | 1000000 | 5000000  |
| de.aktiwir.aktibmi                         | Weight Log & BMI Calculator    | 1.44           | [weight]                | weight   | 1000000 | 5000000  |
| net.daylio                                 | Diary - Mood Tracker           | 1.8.3          | [mood]                  | mood     | 100000  | 500000   |
| com.sparkpeople.androidtracker             | Calorie Counter & Diet Tracker | 4.55           | [diet]                  | diet     | 1000000 | 5000000  |
| com.intuit.quickbooks                      | QuickBooks Accounting+Invoice  | 5.1.2          | [timekeeping]           | time     | 1000000 | 5000000  |
| jp.co.recruit.mtl.beslim                   | Weight Loss Tracker - RecStyle | 3.1.7          | [body fat]              | weight   | 1000000 | 5000000  |
| com.aadhk.time                             | Timesheet                      | 1.6.0.9        | [time keeping]          | time     | 500000  | 1000000  |
| fi.polar.polarflow                         | Polar Flow - Activity & Sports | 3.3.1          | [exercise, workouts]    | hardware | 1000000 | 5000000  |
| arproductions.andrew.worklog               | Work Log                       | 2.4.2          | [timekeeping]           | time     | 500000  | 1000000  |
| com.heartrate.monitor                      | Heart Rate Monitor             | 3.684          | [heartrate, heart rate] | heart    | 1000000 | 5000000  |
| com.supersimpleapps.heart_rate_monitor_new | Unique Heart Rate Monitor      | 1.26           | [heartrate, heart rate] | heart    | 1000000 | 5000000  |
| com.dungelin.heartrate                     | Heart Rate Monitor & Tracker   | 2.4.4          | [heartrate, heart rate] | heart    | 500000  | 1000000  |
| com.rauscha.apps.timesheet                 | Timesheet - Time Tracker       | 2.1.3          | [time keeping]          | time     | 500000  | 1000000  |
| comm.cchong.BloodAssistant                 | iCare Health Monitor (BP & HR) | 3.3.3.170207   | [heartrate, heart rate] | heart    | 500000  | 1000000  |
| com.soh                                    | Secret Of Happiness            | 2.1.0          | [happiness]             | mood     | 100000  | 500000   |

|                         |                               |        |                      |          |        |        |
|-------------------------|-------------------------------|--------|----------------------|----------|--------|--------|
| com.livestrong.tracker  | MyPlate Calorie Tracker       | 2.9.0  | [eating]             | diet     | 100000 | 500000 |
| com.bliss.phonegap      | Gratitude Journal             | 2.0.6  | [happiness]          | mood     | 100000 | 500000 |
| com.moodtools.moodtools | MoodTools - Depression Aid    | 2.2.8  | [mood]               | mood     | 100000 | 500000 |
| com.moodtrak.diary      | Moodtrack Diary: Mood Tracker | 3.2    | [mood]               | mood     | 50000  | 100000 |
| de.aktiwir.aktifit      | Simple Workout Log - aktiFit  | 2.6    | [exercise, workouts] | exercise | 10000  | 50000  |
| com.xiaomi.hm.health    | Mi Fit                        | 2.2.9  | [hardware]           | hardware |        |        |
| com.jawbone.upopen      | UP - Smart Coach for Health   | 4.27.0 | [hardware]           | hardware |        |        |
